# Supplementary material for: Engineering crystalline CoOOH anchored on an N-doped carbon support as a durable electrocatalyst for the oxygen reduction reaction
Source: Royal Society of Chemistry journal article supplement (doi:10.1039/c8dt00826d), 2018-01-01
Supplement: c8dt00826d1.pdf [file c8dt00826d1.pdf]

## **Engineering crystalline CoOOH anchored on N-doped carbon support as a durable electrocatalyst for oxygen reduction reaction**

Liming Zeng,<sup>a,b</sup> Xiangzhi Cui <sup>\*a</sup> and Jianlin Shi<sup>\* a</sup>

<sup>a</sup>State Key Lab of High Performance Ceramics and Superfine Microstructure, Shanghai Institute of Ceramics, Chinese Academy of Sciences, Shanghai, 200050, China.

<sup>b</sup>*University of Chinese Academy of Sciences, Chinese Academy of Sciences, Beijing 100049, China.*

\*corresponding author. E-mail: [cuixz@mail.sic.ac.cn](mailto:cuixz@mail.sic.ac.cn)(X. Z. Cui); [jlshi@mail.sic.ac.cn](mailto:jlshi@mail.sic.ac.cn)(J. L. Shi);

Fax: + 86-21-52413122; Tel: + 86-21-52412712

## Materials Characterizations

The X-ray diffraction (XRD) pattern was measured on a Rigaku D/Max-2550 V X-ray diffractometer with a Cu K $\alpha$  radiation target (40 kV, 40 mA). Scanning electron microscope (SEM) imaging was performed using a Hitachi-S4800 scanning electron microscope (3.0 kV) and Magellan 400 field emission scanning electron microscope (30 kV). Transmission electron microscopic (TEM) imaging was conducted on a JEOL-2100F high resolution transmission electron microscope (200 kV). X-ray photoelectron spectroscopy (XPS) were recorded on a VG Micro MK II instrument using monochromatic Mg K $\alpha$  X-rays (150 W, 1253.6 eV), and the C 1s electron peak (BE= 285 eV) was used as internal reference for spectrum calibration. A CHI 760E electrochemical workstation (CH Instruments) and the PINE instrument were used to evaluate the electrochemical properties of the samples.

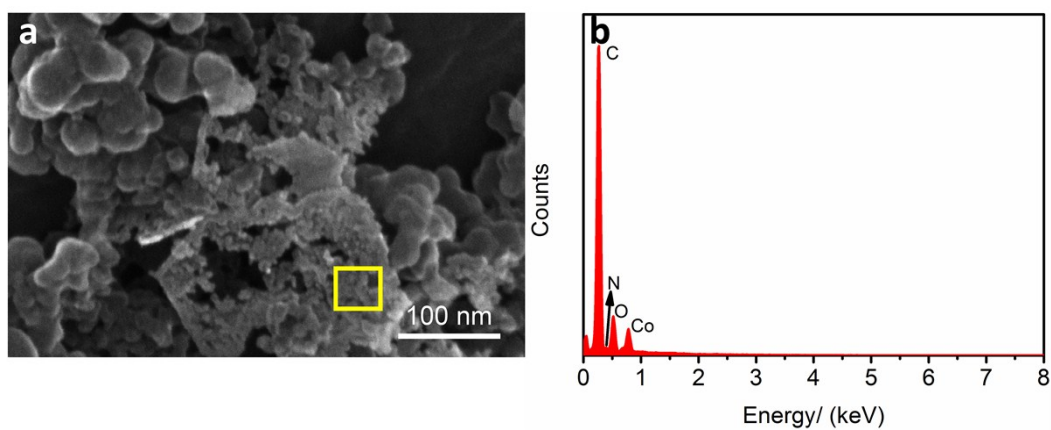

**Fig. S1** (a) SEM image of CoOOH@NC-175/300 and (b) corresponding EDX spectrum of the red rectangle area in (a).

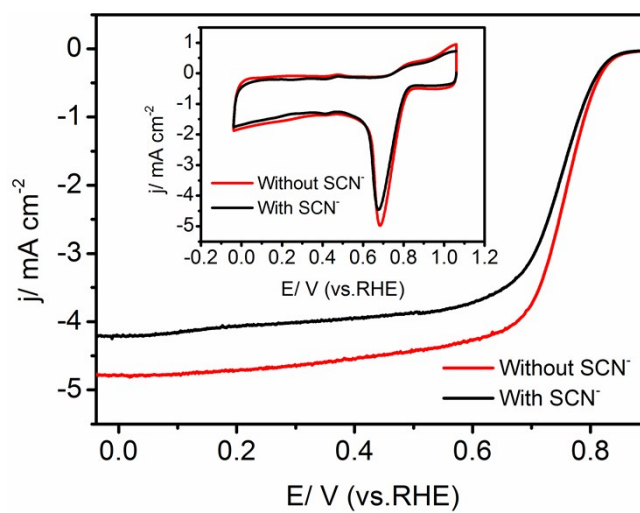

**Fig. S2** LSV curves and CV curves (inset) of CoOOH@NC-175/300 with and without addition of  $\text{SCN}^-$  solution (0.1 M).

**Table S1.** Elemental composition of CoOOH@NC-175/300 from EDX analysis.

| Elements | C     | O    | N    | Co   |
|----------|-------|------|------|------|
| Atomic % | 88.72 | 6.24 | 1.07 | 3.97 |

**Table S2.** Elemental composition of CoOOH@NC-175/300 derived from XPS analysis

| Elements | C 1s  | O 1s | N 1s | Co 2p |
|----------|-------|------|------|-------|
| Atomic % | 87.87 | 6.53 | 2.99 | 2.6   |
